# Supplementary material for: Bridging the gap between tight and loose contacts for soot oxidation by vanadium doping of cryptomelane nanorods catalyst using NO2 as an oxygen carrier
Source: Royal Society of Chemistry journal article supplement (doi:10.1039/c8cy00545a), 2018-01-01
Supplement: c8cy00545a1.pdf [file c8cy00545a1.pdf]

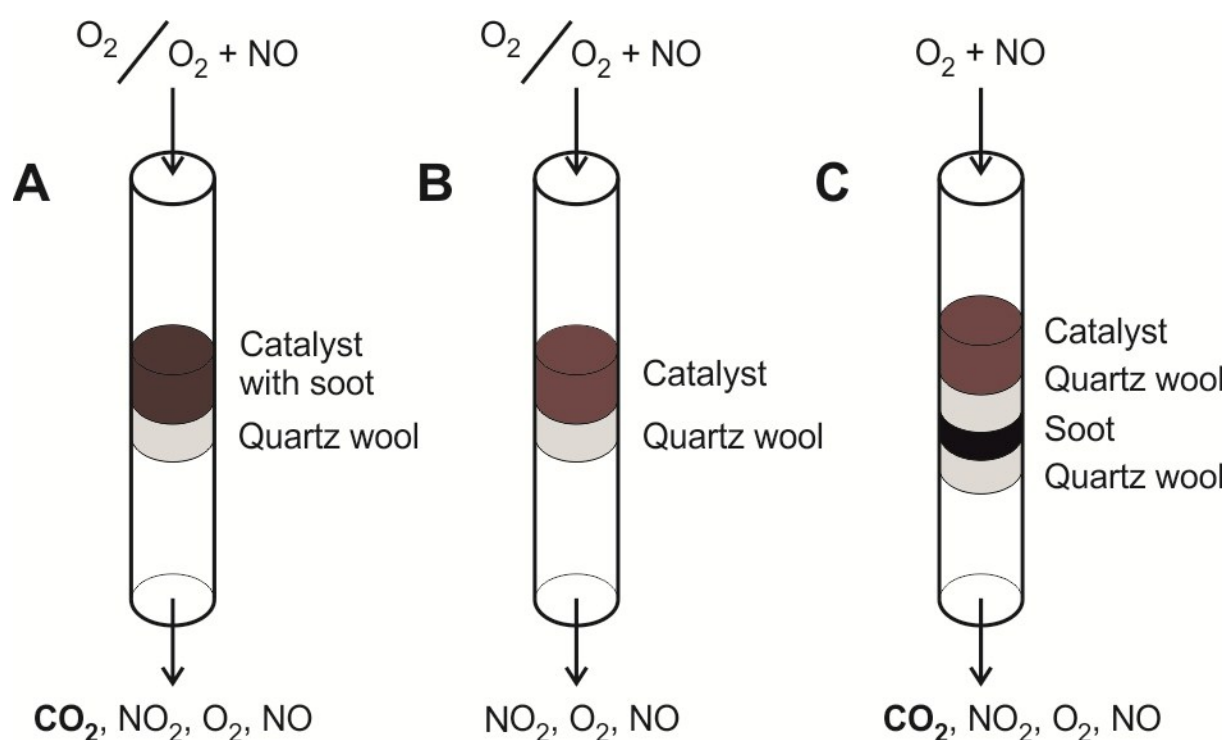

**Figure S1** - experimental setups for catalytic tests. A – loose-contact soot combustion, B – no oxidation and C – contactless soot combustion.

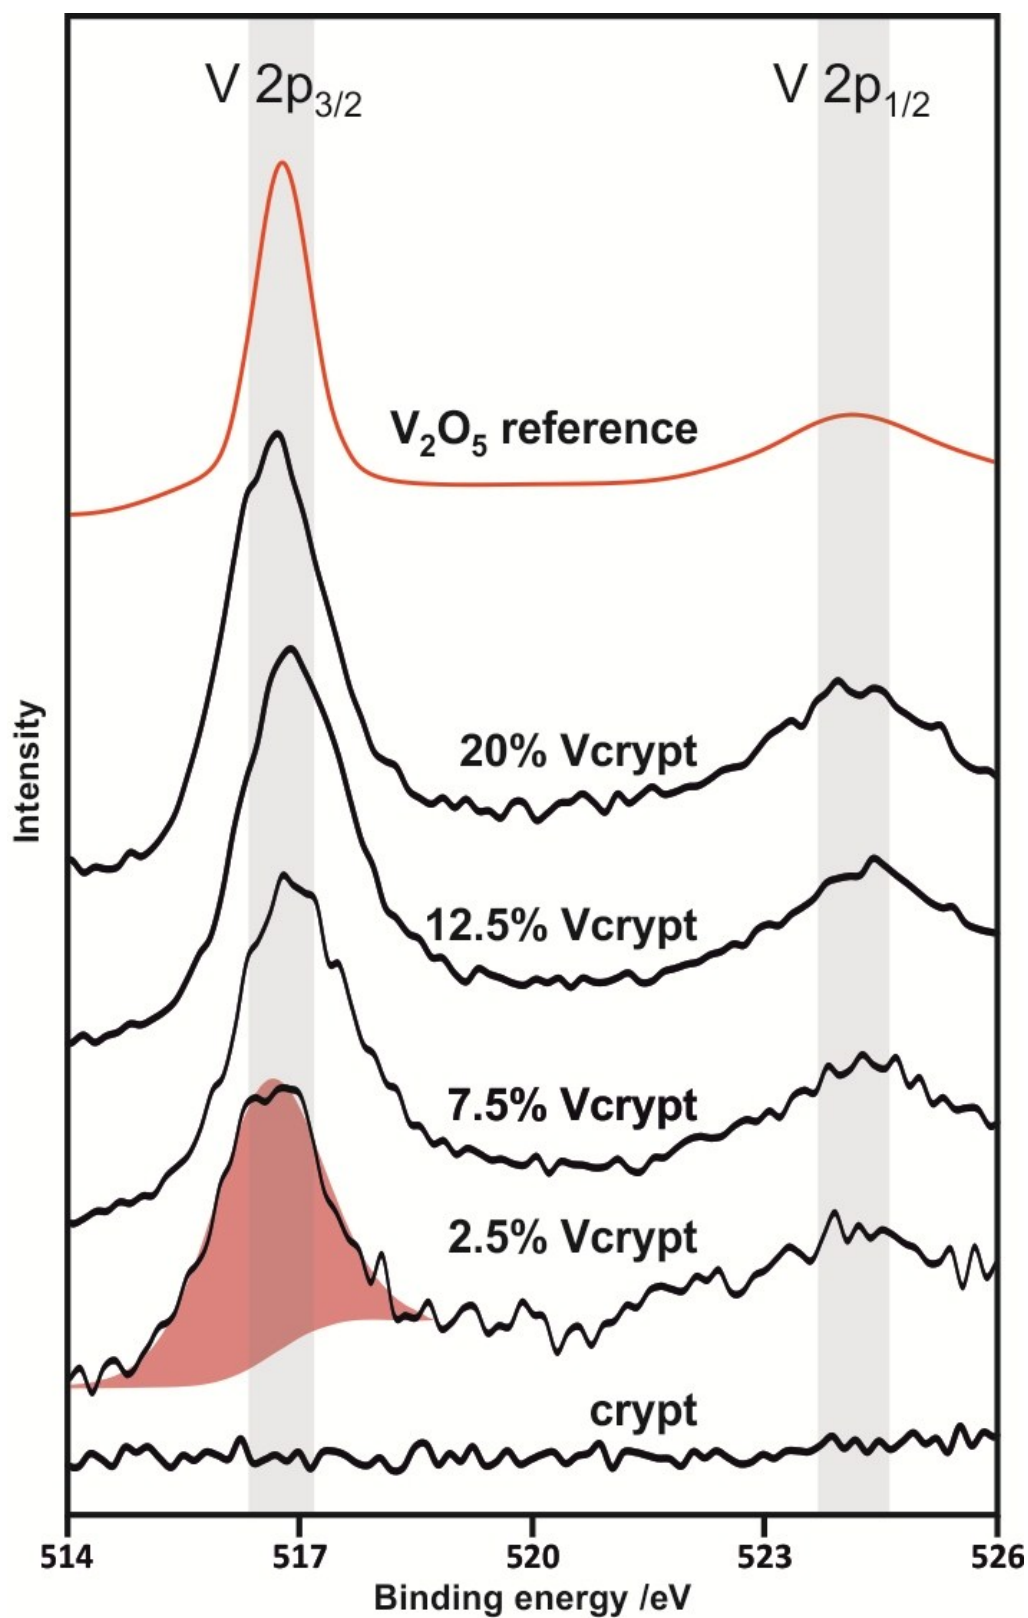

**Figure S2** – the XPS vanadium 2p<sub>3/2</sub> and V 2p<sub>1/2</sub> narrow scan spectra for the investigated V-doped cryptomelane catalysts together with the V<sub>2</sub>O<sub>5</sub> reference. The red shaded area shows the fitting for V<sup>5+</sup> band. No significant contribution from V<sup>4+</sup> was observed.
